# Supplementary material for: Facile fabrication of hierarchical textures for substrate-independent and durable superhydrophobic surfaces
Source: Royal Society of Chemistry journal article supplement (doi:10.1039/d2nr02157a), 2022-01-01
Supplement: d2nr02157a1.pdf [file d2nr02157a1.pdf]

## Electronic Supporting Information

### **Facile fabrication of hierarchical textures for substrate-independent and durable superhydrophobic surfaces**

Yuchun He,<sup>a</sup> Lingxiao Wang,<sup>a</sup> Tingni Wu,<sup>a</sup> Zhipeng Wu,<sup>a</sup> Yu Chen<sup>a</sup> and Kai Yin<sup>\*a,b</sup>

<sup>a</sup> *Hunan Key Laboratory of Nanophotonics and Devices, School of Physics and Electronics, Central South University, Changsha, 410083, China*

<sup>b</sup> *The State Key Laboratory of High Performance and Complex Manufacturing, College of Mechanical and Electrical Engineering, Central South University, Changsha 410083, China*

This file contains Supplementary Figures S1-S4.

\*To whom correspondence should be addressed.

\*Corresponding author: [kaiyin@csu.edu.cn](mailto:kaiyin@csu.edu.cn)

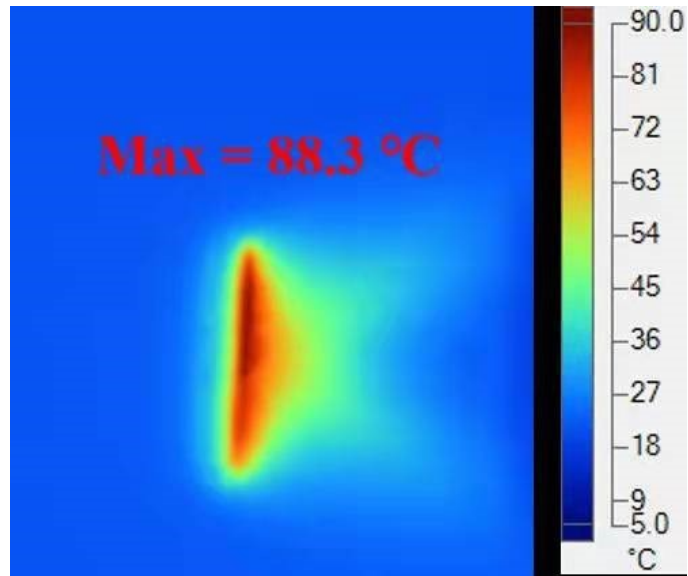

S1: IR temperature diagram of PTFE during laser treating.

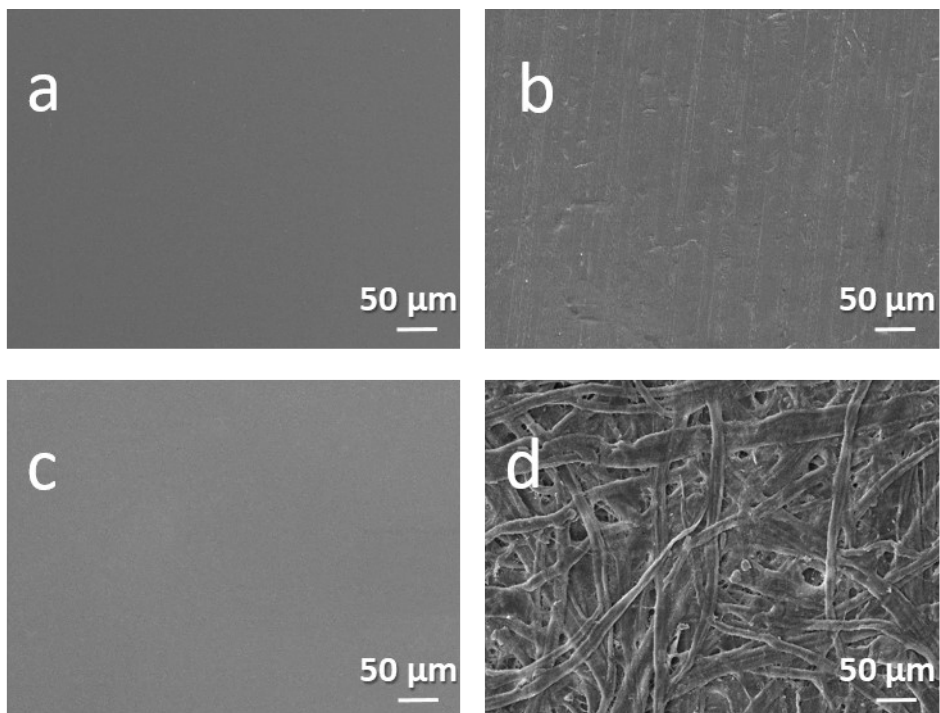

S2: SEM images of pristine four substrates (quartz glass, stainless steel, silicon wafer, and paper).

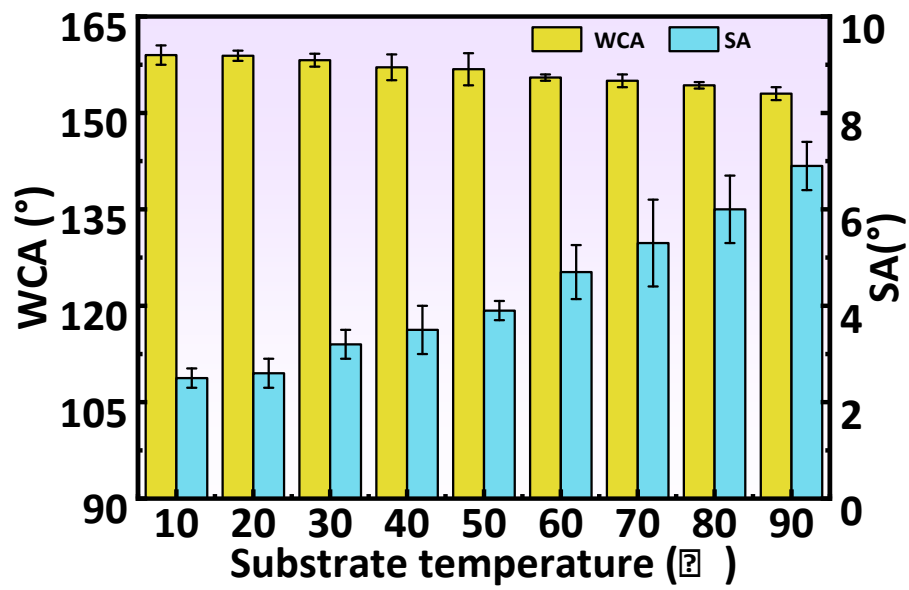

S3: The WCAs and the SAs of the laser-treated quartz glass under different temperatures.

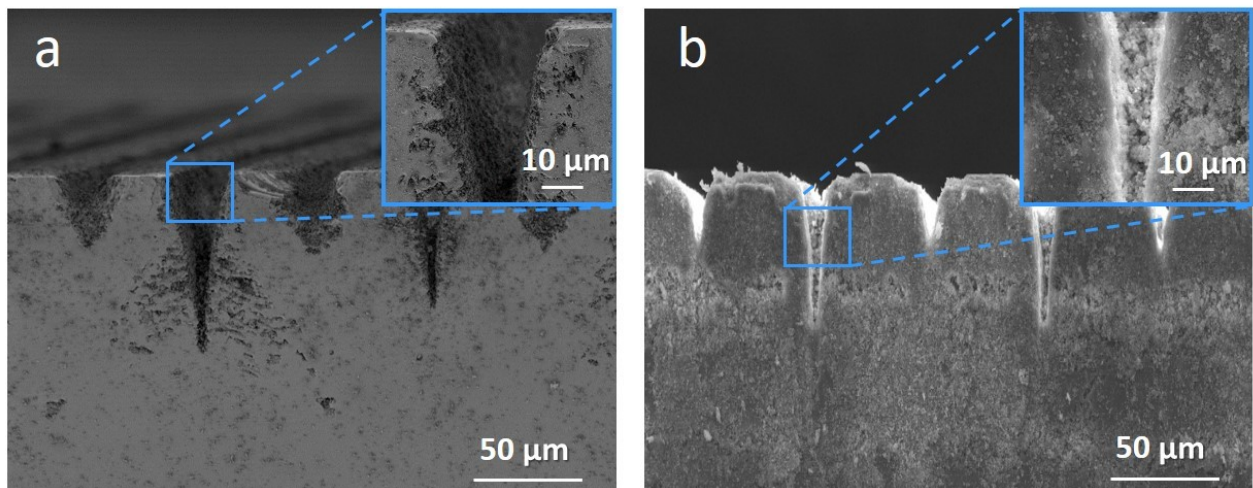

S4: SEM images of the cross-section of quartz glass treated with PTFE covered or not.
